# Supplementary material for: Dysbiosis in the Gut Microbiota of Patients with Multiple Sclerosis, with a Striking Depletion of Species Belonging to Clostridia XIVa and IV Clusters
Source: PLoS One. 2015 Sep 14;10(9):e0137429. doi: 10.1371/journal.pone.0137429 (PMC4569432; doi:10.1371/journal.pone.0137429)
Supplement: S5 Table — (XLSX) [file pone.0137429.s007.xlsx]

## Sheet: Table S5
	Supplementary Table S5. Details of the 21 species having significant increase or decrease between HC40 and MS20.
	Cluster	Phylum	*Genus	Best hit species	Identity (%)	Coverage (%)	P-value	HC40		MS20		***Log10 (MS/HC)
								Average read#	SD	Average read#	SD
	rclust00410	Actinobacteria	Eggerthella	Eggerthella lenta	100	100	0.03989	3.43	4.48	9.75	12.54	0.45
	rclust00054	Firmicutes	Streptococcus	Streptococcus thermophiles/salivarius	100.0/99.7	100	0.01652	22.5	30.8	61.8	64.48	0.44
	rclust00397	Firmicutes	Faecalibacterium	Faecalibacterium prausnitzii	99	100	0.04167	307.53	201.26	179.1	230.93	-0.23
	rclust00107	Firmicutes	Anaerostipes	Anaerostipes hadrus	100	100	0.03991	64.98	63.16	28.55	62.24	-0.36
	rclust00240	Firmicutes	Eubacterium	Eubacterium rectale ATCC 33656	100	100	0.02201	139.83	182.15	51.95	106.09	-0.43
	unmap_OTU00057	Firmicutes	(Clostridium)	Clostridium sp.	93.8	100	0.00553	8.6	9.67	2.95	5.48	-0.46
	rclust00231	Firmicutes	Coprococcus	butyrate-producing bacterium SL7/1	99.4	100	0.04398	9.13	15.56	2.9	7.86	-0.5
	unmap_OTU00078	Firmicutes	(Clostridium)	Clostridium sp. RT8	94.7	100	0.00183	8.53	11.44	2	3.67	-0.63
	rclust00019	Bacteroidetes	Bacteroides	Bacteroides stercoris	100	100	0.01038	23.5	36.96	5.1	16.78	-0.66
	rclust00024	Bacteroidetes	Bacteroides	Bacteroides coprocola	99.4	100	0.0342	28.88	67.82	4.35	15.02	-0.82
	rclust00489**	Firmicutes	(Lachnospira)	Lactobacillus rogosae	96	100	0.00098	6	8.79	0.9	1.77	-0.82
				Lachnospira pectinoschiza	94.5
	rclust00715**	Firmicutes	Undefined	Roseburia sp.1120	99.4	100	0.00359	12.93	22.22	1.9	2.86	-0.83
				Clostridiaceae bacterium SH032	85.4
	rclust00226	Proteobacteria	Sutterella	Sutterella wadsworthensis 2_1_59BFAA	100	97.8	0.02023	5.03	11.03	0.7	1.87	-0.86
	unmap_OTU00273	Firmicutes	(Clostridium)	Clostridium sp. ID5	92.6	100	0.04574	3.75	9.92	0.45	1.47	-0.92
	rclust00268	Bacteroidetes	Bacteroides	Bacteroides coprophilus	100	100	0.03034	11.88	33.42	ND	ND	-1.07
	unmap_OTU00005	Firmicutes	(Clostridium)	Clostridium sp. RT8	94.4	100	1e-05	5.38	5.89	0.45	1.15	-1.08
	rclust00467	Firmicutes	Coprococcus	butyrate-producing bacterium A2-175	99.7	100	0.00021	6.5	9.17	0.5	1.4	-1.11
	unmap_OTU00644	Firmicutes	(Desulfotomaculum)	Desulfotomaculum sp. CYP1	92.9	100	0.00161	5.2	8.9	0.4	0.82	-1.11
	unmap_OTU00151	Firmicutes	(Clostridium)	Clostridium sp. RT8	92.6	100	0.00237	3.53	6.27	0.25	0.91	-1.15
	rclust00255	Bacteroidetes	Prevotella	Prevotella copri DSM 18205	99.1	100	0.029	134.55	360.73	5.05	14.91	-1.43
	rclust00125	Firmicutes	Megamonas	Megamonas funiformis YIT 11815	99.1	100	0.00648	26.68	57.62	0.45	1.61	-1.77
	*The putative genera tentatively assigned are shown in parentheses for clusters with the highest similarity of <95% to known species.
	**Species with the secondly highest similarity are also indicated for rclust00489 and rclust00715 (see text).
	***Read number = 1 was assumed for ND (not detected) for calculation of MS/HC.
